# Supplementary material
Source: PubMed Central journal article supplement (PMC5818842)
Supplement: jama-318-1358-s001.pdf [file jama-318-1358-s001.pdf]

## Supplementary Online Content

Karges B, Schwandt A, Heidtmann B, et al. Association of insulin pump therapy vs insulin injection therapy with severe hypoglycemia, ketoacidosis, and glycemic control among children, adolescents, and young adults with type 1 diabetes. *JAMA*. doi: 10.1001/jama.2017.13994

**eFigure 1.** Rates of Severe Hypoglycemia and Diabetic Ketoacidosis With Injection Therapy and With Pump Therapy by Age Group in the Matched Cohort

**eFigure 2.** Insulin Treatment-Related Parameters With Injection Therapy and With Pump Therapy by Age Group in the Matched Cohort

**eTable.** Glycated Hemoglobin Levels With Injection Therapy and With Pump Therapy by Age Group in the Matched Cohort

**eAppendix.** Contributing DPV Institutions

This supplementary material has been provided by the authors to give readers additional information about their work.

**eFigure 1. Rates of Severe Hypoglycemia and Diabetic Ketoacidosis With Injection Therapy and With Pump Therapy by Age Group in the Matched Cohort**

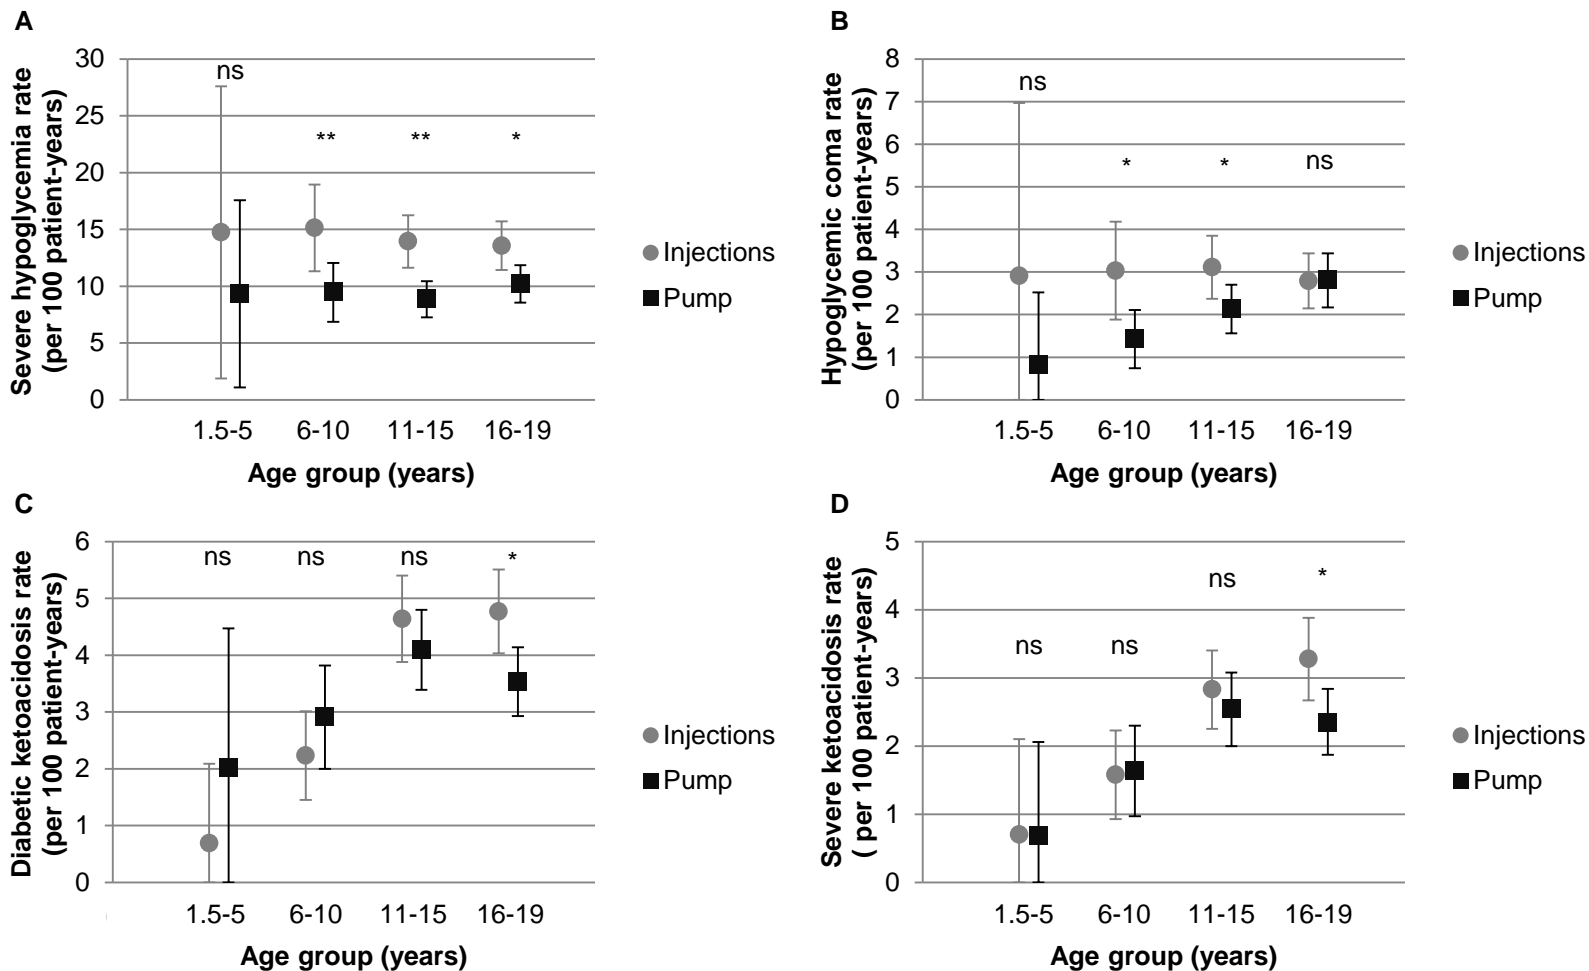

### eFigure 1 (cont'd)

Shown are mean rates per 100 patient-years with 95% confidence intervals estimated from one negative binomial regression model including a therapy × age group interaction term and with matched pairs as a random factor. The age group 1.5 to 5 years consisted of 156 patients with injection therapy comprising 145 patient-years and of 172 patients with pump therapy comprising 147 patient-years. The age group 6 to 10 years consisted of 1,594 patients with injection therapy comprising 1,656 patient-years and of 1,578 patients with pump therapy comprising 1,646 patient-years. The age group 11 to 15 years consisted of 3,801 patients with injection therapy comprising 4,209 patient-years and of 3,773 patients with pump therapy comprising 4,166 patient-years. The age group 16 to 19 years consisted of 4,263 patients with injection therapy comprising 4,611 patient-years and of 4,291 patients with pump therapy comprising 4,680 patient-years. Panel A shows the rate of severe hypoglycemia per 100 patient-years. Panel B shows the rate of hypoglycemic coma per 100 patient-years. Panel C shows the rate of diabetic ketoacidosis (pH <7.3) per 100 patient-years. Panel D shows the rate of severe ketoacidosis (pH <7.1) per 100 patient-years. \*\* denotes P values < .001, \*denotes P value < .001, ns denotes not significant P values > .05.

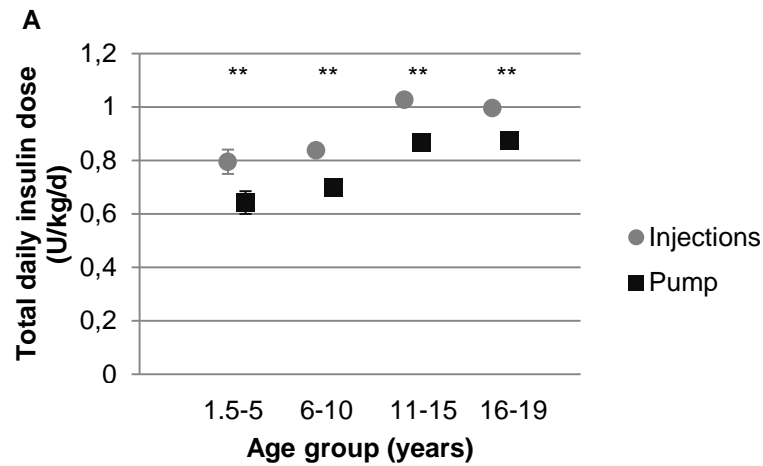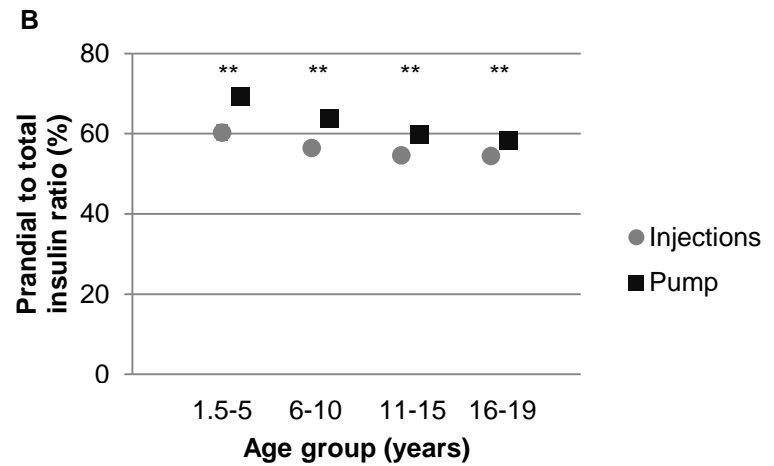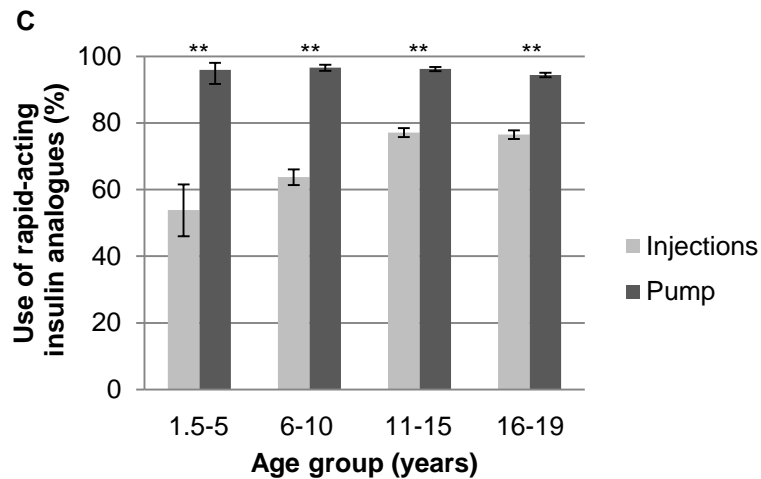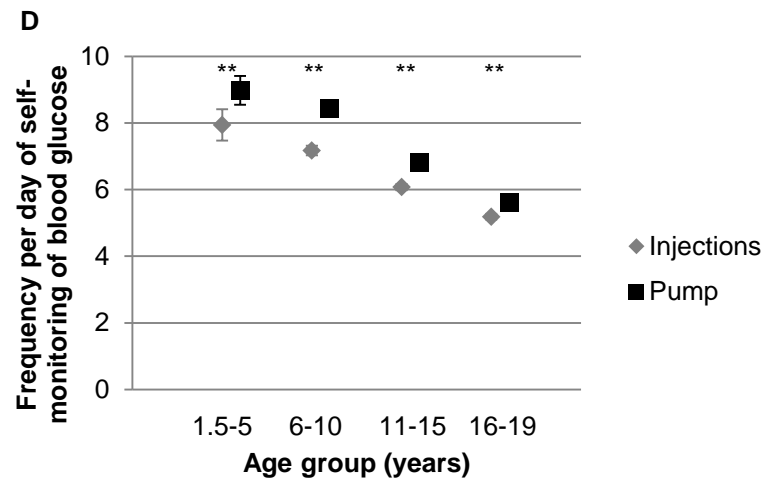

## eFigure 2 (cont'd)

Shown are mean values of the insulin-treatment related parameters with 95% confidence intervals estimated from one linear (for outcomes total daily insulin dose, prandial to total insulin ratio, frequency per day of self-monitoring of blood glucose level) or logistic (for use of rapid-acting insulin analogues) regression model including a therapy × age group interaction term and with matched pairs as a random factor. The age group 1.5 to 5 years consisted of 156 patients with injection therapy comprising 145 patient-years and of 172 patients with pump therapy comprising 147 patient-years. The age group 6 to 10 years consisted of 1,594 patients with injection therapy comprising 1,656 patient-years and of 1,578 patients with pump therapy comprising 1,646 patient-years. The age group 11 to 15 years consisted of 3,801 patients with injection therapy comprising 4,209 patient-years and of 3,773 patients with pump therapy, comprising 4,166 patient-years. The age group 16 to 19 years consisted of 4,263 patients with injection therapy comprising 4,611 patient-years and of 4,291 patients with pump therapy comprising 4,680 patient-years. Panel A shows the total daily insulin dose in Units per kilogram body weight per day. Panel B shows the prandial to total insulin ratio in percent. Panel C shows the use of rapid-acting insulin analogues in percent. Panel D shows the frequency per day of self-monitoring of blood glucose level. \*\* denotes P values < .001.

**eTable. Glycated Hemoglobin Levels With Injection Therapy and With Pump Therapy by Age Group in the Matched Cohort**

|                                                         | <b>1.5 to 5 yrs.</b>    | <b>6 to 10 yrs.</b>       | <b>11 to 15 yrs.</b>      | <b>16 to 19 yrs.</b>      |
|---------------------------------------------------------|-------------------------|---------------------------|---------------------------|---------------------------|
| Injection therapy<br>Glycated hemoglobin, %<br>(95% CI) | 7.36<br>(7.13-7.59)     | 7.52<br>(7.45-7.59)       | 8.18<br>(8.14-8.23)       | 8.48<br>(8.44-8.53)       |
| Pump therapy<br>Glycated hemoglobin, %<br>(95% CI)      | 7.38<br>(7.15-7.60)     | 7.40<br>(7.32-7.47)       | 8.02<br>(7.97-8.07)       | 8.29<br>(8.25-8.33)       |
| Between-group difference<br>(95% CI)                    | 0.02<br>(-0.30 to 0.34) | -0.12<br>(-0.22 to -0.03) | -0.16<br>(-0.23 to -0.10) | -0.19<br>(-0.25 to -0.13) |
| P value                                                 | .91                     | .02                       | < .001                    | < .001                    |

Values of glycated hemoglobin levels in percent are estimated from one linear regression model including a therapy × age group interaction term and with matched pairs as a random factor. Conversion for glycated hemoglobin in mmol/mol = (glycated hemoglobin [%] – 2.15) \* 10.929.

## eAppendix. Contributing DPV Institutions

### The following 350 DPV institutions contributed data to this analysis:

Aachen - Innere RWTH, Aachen - Uni-Kinderklinik RWTH, Aalen Kinderklinik, Ahlen St. Franziskus Kinderklinik, Aidlingen Praxisgemeinschaft, Amberg Kinderklinik St. Marien, Amstetten Klinikum Mostviertel Kinderklinik, Arnshausen-Hüsten Karolinenhosp. Kinderabteilung, Asbach Kamillus-Klinik Innere, Aue Helios Kinderklinik, Augsburg IV. Med. Klinik, Augsburg Josefinum Kinderklinik, Augsburg Kinderklinik Zentralklinikum, Aurich Kinderklinik, Bad Hersfeld Kinderklinik, Bad Kreuznach-Viktoriaanstift, Bad Kösen Kinder-Rehaklinik, Bad Lauterberg Diabeteszentrum Innere, Bad Mergentheim - Diabetesfachklinik, Bad Mergentheim - Gemeinschaftspraxis DM-dorf Althausen, Bad Oeynhausen Herz-und Diabeteszentrum NRW, Bad Orb Spessart Klinik, Bad Reichenhall Kreisklinik Innere Med., Bad Salzungen Kinderklinik, Bad Waldsee Kinderarztpraxis, Bautzen Oberlausitz KK, Bayreuth Innere Medizin, Berchtesgaden CJD, Berlin DRK-Kliniken Pädiatrie, Berlin DRK-Kliniken Westend Innere, Berlin Endokrinologikum, Berlin Evang. Krankenhaus Königin Elisabeth, Berlin Klinik St. Hedwig Innere, Berlin Lichtenberg - Kinderklinik, Berlin Oskar Zieten Krankenhaus Innere, Berlin Schlosspark-Klinik Innere, Berlin Virchow-Kinderklinik, Berlin Vivantes Hellersdorf Innere, Bern Universitätsklinik InselSpital Innere Medizin, Bielefeld Kinderarztpraxis, Bielefeld Kinderklinik Gilead, Bocholt Kinderklinik, Bochum Universitäts St. Josef, Bochum Universitätskinderklinik St. Josef, Bonn Uni-Kinderklinik, Bottrop Knappschaftskrankenhaus Innere, Braunschweig Kinderarztpraxis, Bremen - Kinderklinik Nord, Bremen - Mitte Innere, Bremen Zentralkrankenhaus Kinderklinik, Bremerhaven Kinderklinik, Bruchweiler Edelsteinklinik Kinder-Reha, Böblingen Kinderklinik, Celle Klinik für Kinder- und Jugendmedizin, Chemnitz Kinderklinik, Coburg Innere Medizin, Coburg Kinderklinik, Coesfeld Kinderklinik, Coesfeld/Dülmen Innere Med., Darmstadt Innere Medizin, Darmstadt Kinderklinik Prinz. Margaret, Datteln Vestische Kinderklinik, Deggendorf Gemeinschaftspraxis, Deggendorf Medizinische Klinik II, Deggendorf Pädiatrie-Praxis, Delmenhorst Kinderklinik, Dessau Kinderklinik, Detmold Kinderklinik, Dinslaken Kinderklinik, Dornbirn Innere Medizin, Dornbirn Kinderklinik, Dortmund Kinderklinik, Dortmund Knappschaftskrankenhaus Innere, Dortmund Medizinische Kliniken Nord, Dortmund-Hombruch Marienhospital, Dortmund-St. Josefhospital Innere, Dresden Neustadt Kinderklinik, Dresden Uni-Kinderklinik, Duisburg Malteser Rhein-Ruhr St. Anna Innere, Duisburg Malteser St. Johannes, Duisburg Sana Kinderklinik, Duisburg-Huckingen, Duisburg-Huckingen Malteser Rhein-Ruhr St. Johannes, Duisburg-St. Johannes Helios, Düren-Birkensdorf Kinderklinik, Düsseldorf Uni-Kinderklinik, Erfurt Kinderklinik, Erlangen Uni Innere Medizin, Erlangen Uni-Kinderklinik, Essen Diabetes-Schwerpunktpraxis, Essen Elisabeth Kinderklinik, Essen Kinderarztpraxis, Essen Uni-Kinderklinik, Esslingen Klinik für Kinder und Jugendliche, Eutin Kinderklinik, Feldkirch Kinderklinik, Filderstadt Kinderklinik, Flensburg Diakonissen Kinderklinik, Forchheim Diabeteszentrum SPP, Frankenthal Kinderarztpraxis, Frankfurt Diabeteszentrum Rhein-Main-Erwachsenendiabetologie (Bürgerhospital), Frankfurt Diabeteszentrum Rhein-Main-pädiat. Diabetologie (Clementine-Hospital), Frankfurt Uni-Kinderklinik, Frankfurt Uni-Klinik Innere, Frankfurt Uni-Klinik Innere, Frankfurt-Sachsenhausen Innere, Frankfurt-Sachsenhausen Innere MVZ, Freiburg Kinder-MVZ, Freiburg St. Josef Kinderklinik, Freiburg Uni Innere, Freiburg Uni-Kinderklinik, Freudenstadt Kinderklinik, Fulda Kinderklinik, Fürth Kinderklinik, Gaissach Fachklinik der Deutschen Rentenversicherung Bayern Süd, Garmisch-Partenkirchen Kinderklinik, Geislingen Klinik Helfenstein Innere, Gelnhausen Innere, Gelnhausen Kinderklinik, Gelsenkirchen Kinderklinik Marienhospital, Gera Kinderklinik, Gießen Ev. Krankenhaus Mittelhessen, Gießen Uni-Kinderklinik, Graz Uni-Kinderklinik, Greifswald Uni-Kinderklinik, Göppingen Innere Medizin, Göppingen Kinderklinik am Eichert, Görlitz Städtische Kinderklinik, Göttingen Uni-Kinderklinik, Hagen Kinderklinik, Halberstadt Kinderklinik AMEOS, Halle Uni-Kinderklinik, Hamburg Altonaer Kinderklinik, Hamburg Endokrinologikum, Hamburg Kinderklinik Wilhelmstift, Hamburg-Nord Kinder-MVZ, Hameln Kinderklinik, Hamm Kinderklinik, Hanau Kinderklinik, Hannover Kinderklinik MHH, Hannover Kinderklinik auf der Bult, Haren Kinderarztpraxis, Heide Kinderklinik, Heidelberg St. Josefskrankenhaus, Heidelberg Uni-Kinderklinik, Heidenheim Kinderklinik, Heilbronn Innere Klinik, Heilbronn Kinderklinik, Herdecke Kinderklinik, Herford Kinderarztpraxis, Herford Klinikum Kinder & Jugendliche, Heringsdorf Inselklinik, Herne Evan. Krankenhaus Innere, Herten St. Elisabeth Innere Medizin, Hildesheim GmbH - Innere, Hildesheim Kinderarztpraxis, Hof Kinderklinik, Homburg Uni-Kinderklinik Saarland, Innsbruck Uni-Kinderklinik, Innsbruck Universitätsklinik Innere, Itzehoe Kinderklinik, Jena Uni-Kinderklinik, Kaiserslautern Kinderarztpraxis, Kaiserslautern-Westpfalzlinikum Kinderklinik, Kamen Klinikum Westfalen Hellmig Krankenhaus, Karlsburg Klinik für Diabetes & Stoffwechsel, Karlsruhe Städtische Kinderklinik, Kassel Klinikum Kinder- und Jugendmedizin, Kempten Oberallgäu Kinderklinik, Kiel Städtische Kinderklinik, Kiel Universitäts-Kinderklinik, Kirchen DRK Krankenhaus Kinderklinik, Kirchheim-Nürtingen Innere, Kleve Innere Medizin, Koblenz Kemperhof 1. Med. Klinik, Koblenz Kinderklinik Kemperhof, Konstanz Innere Klinik, Konstanz Kinderklinik, Krefeld Innere Klinik, Krefeld Kinderklinik, Krefeld-Uerdingen St. Josef Innere, Kreischa-Zscheckwitz Klinik Bavaria, Köln Kinderklinik Amsterdamerstrasse, Köln Uni-Kinderklinik,

Landshut Kinderklinik, Lappersdorf Kinderarztpraxis, Leer Kreiskrankenhaus - Kinderabt., Leipzig Uni-Kinderklinik, Leoben LKH Kinderklinik, Leverkusen Kinderklinik, Lienz BKH Kinderklinik, Lienz Diabetesschwerpunktpraxis für Kinder und Jugendliche, Lilienthal Diabeteszentrum, Limburg Innere Medizin, Lingen Kinderklinik St. Bonifatius, Linz Krankenhaus Barmherzige Schwestern Kardiologie Abt. Int. II, Linz Krankenhaus der Barmherzigen Schwestern Kinderklinik, Linz Landes-Kinderklinik, Lippstadt Evangelische Kinderklinik, Ludwigsburg Kinderklinik, Ludwigshafen Kinderklinik St. Anna-Stift, Ludwigshafen diabetol. SPP, Luxembourg - Centre Hospitalier, Lübeck Uni-Kinderklinik, Lüdenscheid Hilfswerk Kinder & Jugendliche, Lüdenscheid Märkische Kliniken - Kinder & Jugendmedizin, Magdeburg Städtisches Klinikum Innere, Magdeburg Uni-Kinderklinik, Mainz Uni-Kinderklinik, Mannheim Uni-Kinderklinik, Marburg Uni-Kinderklinik, Marktredwitz Innere Medizin, Mechernich Kinderklinik, Meissen Kinderklinik Elblandklinikum, Memmingen Internistische Praxis, Memmingen Kinderklinik, Minden Kinderklinik, Moers Kinderklinik, Murnau am Staffelsee - diabetol. SPP, Mutterstadt Kinderarztpraxis, Mödling Kinderklinik, Mönchengladbach Kinderklinik Rheydt Elisabethkrankenhaus, Mühlendorf am Inn Kinderarztpraxis, München 3. Orden Kinderklinik, München Diabetes-Zentrum Süd, München Kinderarztpraxis diabet. SPP, München von Haunersche Kinderklinik, München-Gauting Kinderarztzentrum, München-Harlaching Kinderklinik, München-Schwabing Kinderklinik, Münster Clemens-Hospital Innere, Münster Herz Jesu Innere, Münster St. Franziskus Kinderklinik, Münster Uni-Kinderklinik, Münster pädiat. Schwerpunktpraxis, Nauen Havellandklinik, Neuburg Kinderklinik, Neumarkt Innere, Neunkirchen Marienhausklinik Kohlhof Kinderklinik, Neuruppin Kinderklinik, Neuss Lukaskrankenhaus Kinderklinik, Neuwied Kinderklinik Elisabeth, Neuwied Marienhaus Klinikum St. Elisabeth Innere, Nürnberg Cnopfsche Kinderklinik, Nürnberg Med. Klinik 4, Nürnberg Zentrum f. Neugeb./Kinder & Jugendl., Oberhausen Innere, Oberhausen Kinderklinik, Oberhausen Kinderpraxis, Oberhausen St. Clemens Hospitale Sterkrade, Oberndorf Gastroenterologische Praxis Schwerpunkt Diabetologie, Oberwart - Burgenländische Krankenanstalten Pädiatrie, Offenbach/Main Innere Medizin, Offenbach/Main Kinderklinik, Offenburg Kinderklinik, Oldenburg Kinderklinik, Oldenburg Schwerpunktpraxis, Olpe pädiatrische Gemeinschaftspraxis, Osnabrück Christliches Kinderhospital, Paderborn St. Vincenz Kinderklinik, Papenburg Marienkrankenhaus Kinderklinik, Passau Kinderarztpraxis, Passau Kinderklinik, Pforzheim Kinderklinik, Pfullendorf Innere Medizin, Pirmasens Städtisches Krankenhaus Innere, Plauen Vogtlandklinikum, Ravensburg Kinderklinik St. Nikolaus, Regensburg Kinderklinik St. Hedwig, Rendsburg Kinderklinik, Reutlingen Kinderarztpraxis, Reutlingen Kinderklinik, Reutlingen Klinikum Steinenberg Innere, Rheine Mathiasspital Kinderklinik, Ried Innkreis Barmherzige Schwestern, Rodalben St. Elisabeth, Rosenheim Innere Medizin, Rosenheim Kinderklinik, Rosenheim Schwerpunktpraxis, Rostock Uni-Kinderklinik, Rostock Universität Innere Medizin, Rotenburg/Wümme Agaplesion Diakonieklinikum Kinderabteilung, Rüsselsheim Kinderklinik, Saaldorf-Surheim Diabetespraxis, Saalfeld Thüringenklinik Kinderklinik, Saarbrücken Kinderklinik Winterberg, Saarlouis Kinderklinik, Salzburg Universitäts-Kinderklinik, Scheidegg Prinzregent Luitpold, Schw. Gmünd Stauferklinik Kinderklinik, Schweinfurt Kinderklinik, Schwerin Innere Medizin, Schwerin Kinderklinik, Schwäbisch Hall Diakonie Kinderklinik, Siegen Kinderklinik, Singen - Hegauklinik Kinderklinik, Singen Kinderarztpraxis, Spaichingen Innere, Speyer Diakonissen Stiftungs-Krankenhaus Pädiatrie, St. Augustin Kinderklinik, St. Pölten Universitäts-Kinderklinik, St. Pölten Universitätsklinik Innere, Stade Kinderklinik, Stockerau Landeskrankenhaus, Stolberg Kinderklinik, Stuttgart Olgahospital Kinderklinik, Suhl Kinderklinik, Sylt Rehaklinik, Tettngang Innere Medizin, Traunstein Kinderklinik, Traunstein diabetol. Schwerpunktpraxis, Trier Kinderklinik der Borromäerinnen, Trostberg Innere, Tübingen Uni-Kinderklinik, Ulm Endokrinologikum, Ulm Schwerpunktpraxis Bahnhofplatz, Ulm Uni Innere Medizin, Ulm Uni-Kinderklinik, Vechta Kinderklinik, Viersen Kinderkrankenhaus St. Nikolaus, Villach Kinderklinik, Villingen-Schwenningen Schwarzwald Baar Klinikum Kinderklinik, Villingen-Schwenningen Schwarzwald-Baar-Klinikum Innere, Waldshut Kinderpraxis, Waldshut-Tiengen Kinderpraxis Biberbau, Wangen Oberschwabenklinik Innere Medizin, Waren-Müritzkinderklinik, Weiden Kinderklinik, Weingarten Kinderarztpraxis, Weisswasser Kreiskrankenhaus, Wels Klinikum Pädiatrie, Wernberg-Köblitz SPP, Wien 3. Med. Hietzing Innere, Wien Preyersches Kinderspital, Wien Rudolfstiftung, Wien SMZ Ost Donauspital, Wien Uni-Kinderklinik, Wien Wilhelminenspital 5. Med. Abteilung, Wiesbaden Helios Horst-Schmidt-Kinderkliniken, Wiesbaden Kinderklinik DKD, Wilhelmshaven Klinikum Kinderklinik, Winnenden Rems-Murr Kinderklinik, Wismar Kinderklinik, Wittenberg Innere Medizin, Wittenberg Kinderklinik, Wolgast Innere Medizin, Worms - Weierhof, Worms Kinderklinik, Wuppertal Kinderklinik, Zweibrücken Kinderarztpraxis.
